# Supplementary material for: Cooperative Effect of miR-141-3p and miR-145-5p in the Regulation of Targets in Clear Cell Renal Cell Carcinoma
Source: PubMed Central journal article supplement (PMC4919070; doi:10.1371/journal.pone.0157801), 2016-06-23
Supplement: pone.0157801.s002.pdf [file pone.0157801.s002.pdf]

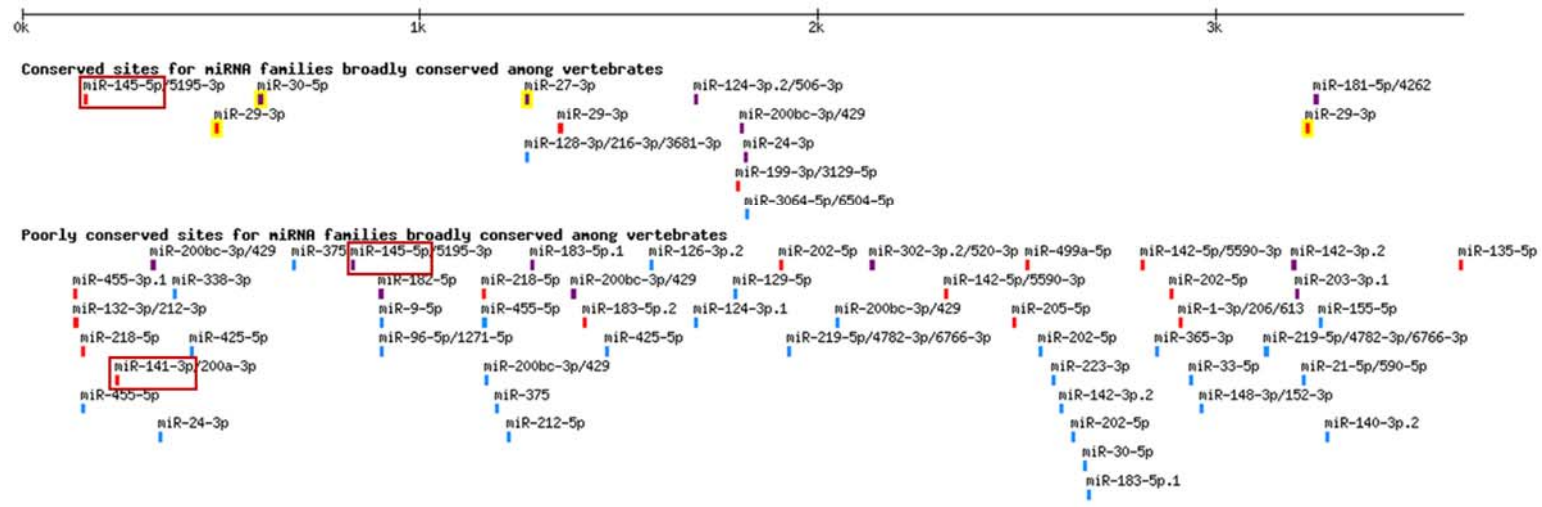

**3'UTR of  
LOX mRNA**

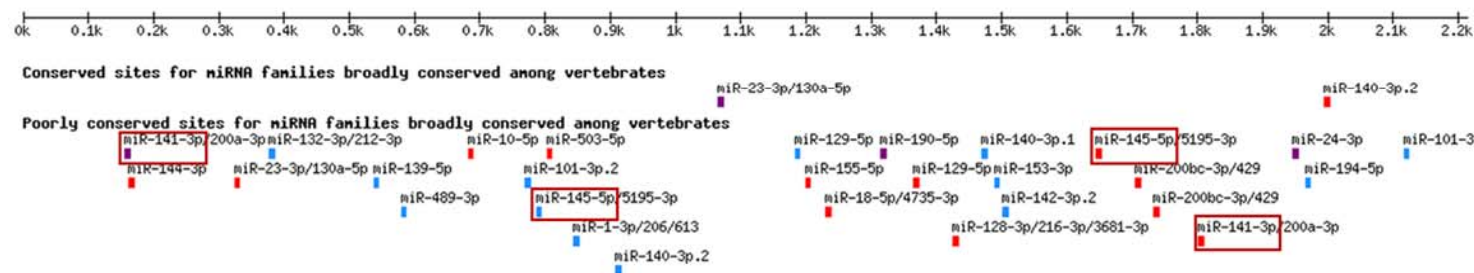

**3'UTR of  
HS6ST2 mRNA**

**S2 Fig. Predicted binding sites on target transcripts.**

Graphs were generated by TargetScan prediction tool.

LOX: miR-141-3p (236-242)

miR-145-5p (156-162; 827-834)

HS6ST2: miR-141-3p (155-162; 1802-1808)

miR-145-5p (787-793; 1645-1651)
