# Supplementary material for: Cooperative Effect of miR-141-3p and miR-145-5p in the Regulation of Targets in Clear Cell Renal Cell Carcinoma
Source: PubMed Central journal article supplement (PMC4919070; doi:10.1371/journal.pone.0157801), 2016-06-23
Supplement: pone.0157801.s004.pdf [file pone.0157801.s004.pdf]

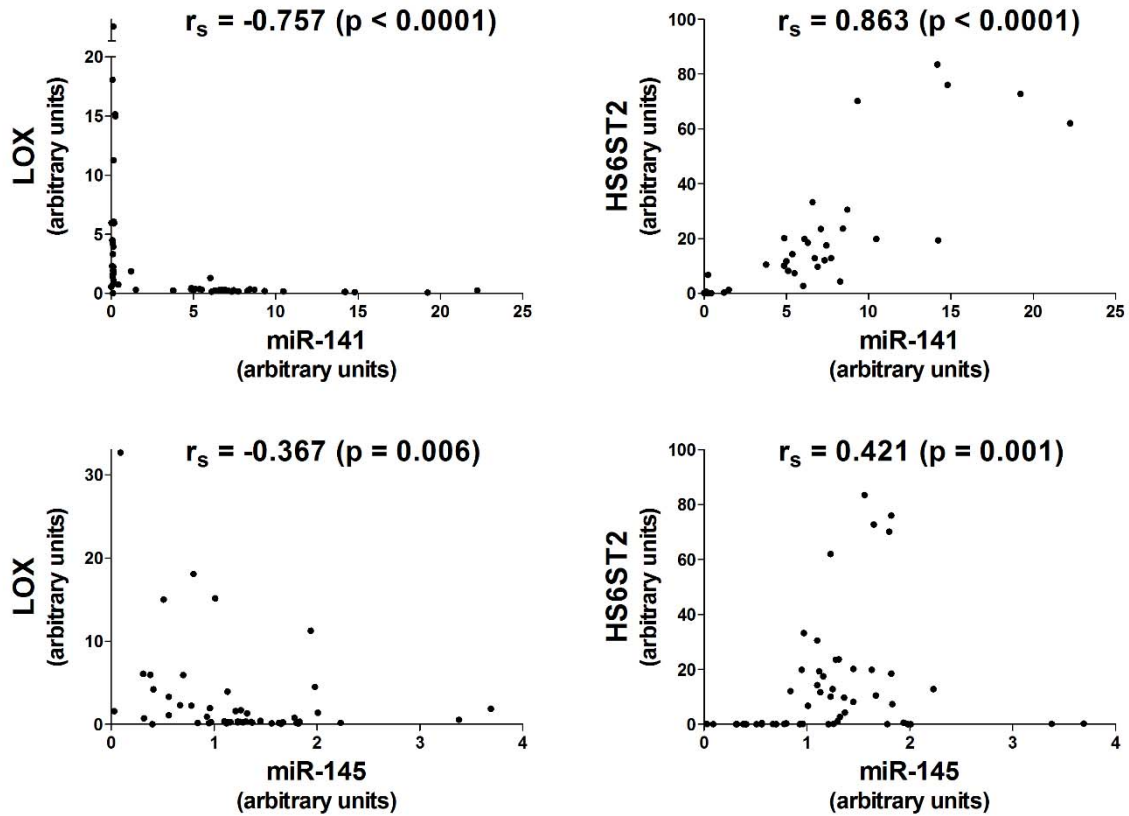

**S4 Fig. Correlation of expression between miRNAs miR-141-3p and miR-145-5p and targets HS6ST2 and LOX.** Correlation between miRNA and target expression in non-malignant and malignant renal tissue of ccRCC patients.  $r_s$  = Spearman rank correlation coefficients.
