# Supplementary material for: Cooperative Effect of miR-141-3p and miR-145-5p in the Regulation of Targets in Clear Cell Renal Cell Carcinoma
Source: PubMed Central journal article supplement (PMC4919070; doi:10.1371/journal.pone.0157801), 2016-06-23
Supplement: pone.0157801.s005.pdf [file pone.0157801.s005.pdf]

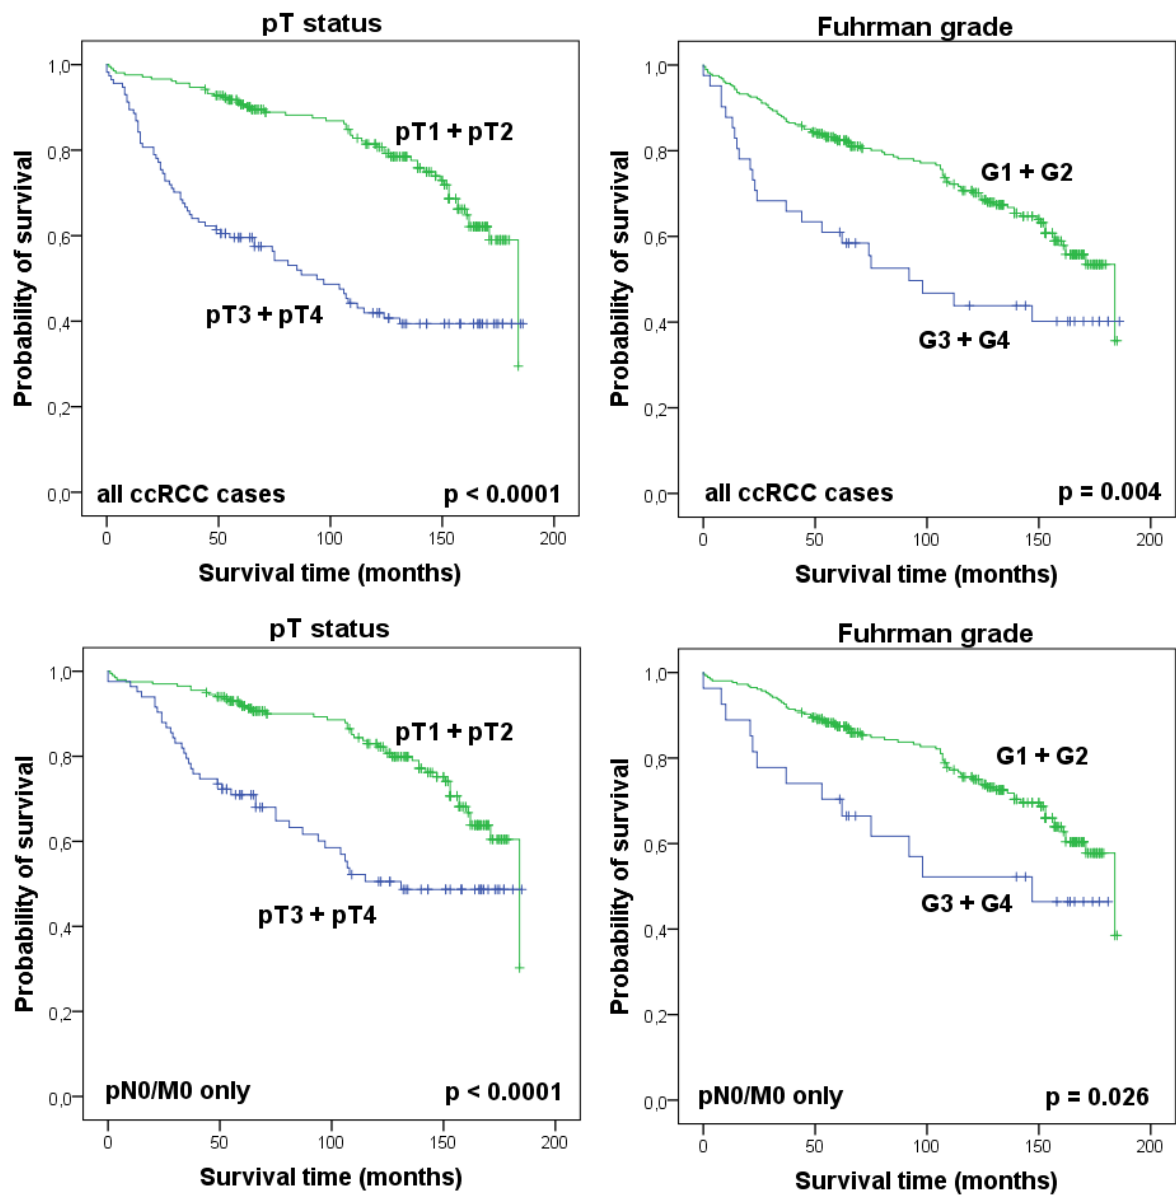

**S5 Fig. Kaplan–Meier analysis of overall survival of ccRCC patients after nephrectomy depending on clinicopathological markers. Log rank test.**
