# Supplementary material for: Cooperative Effect of miR-141-3p and miR-145-5p in the Regulation of Targets in Clear Cell Renal Cell Carcinoma
Source: PubMed Central journal article supplement (PMC4919070; doi:10.1371/journal.pone.0157801), 2016-06-23
Supplement: pone.0157801.s007.pdf [file pone.0157801.s007.pdf]

**S1 Table. Assay information for RT-qPCR.**

| <b>Gene</b> | <b>Forward (5'-3')</b> | <b>Reverse (5'-3')</b>      | <b>Assay</b> | <b>Tm</b> |
|-------------|------------------------|-----------------------------|--------------|-----------|
| EAPP        | TTCCGGATGACTACGACCCC   | AGCACATCCACTTCATCCTCAG      | SYBR         | 57°C      |
| FRMD4A      | AGCAAGGGGAAGATCATCAG   | CGACTGCGAGCTATCTGATTC       | UPL #40      | 60°C      |
| HS6ST2      | TGCGATCTTCTCCAAGATTTTC | CGATCACGGCAAATAGGAAG        | UPL #9       | 60 °C     |
| ITGB3       | AGCTCATTGTTGATGCTTATGG | AACTCTTCAGGGAGGTCACG        | UPL #11      | 60°C      |
| LOX         | TGGCCGACCCCTACTACATC   | ACATCTGCCCTGTATGCTGT        | SYBR         | 59 °C     |
| NRP2        | GGTATACCCGGAGAGGTGGT   | TCTACCGTGGGCTTGGAGT         | UPL #26      | 60°C      |
| SLC16A3     | GAGTTTGGGATCGGCTACAG   | CGGTTACGCGACACACTG          | UPL #58      | 60°C      |
| TGFB2       | ATAGACATGCCGCCCTTCTT   | GGCATCAAGGTACCCACAGA        | SYBR         | 57°C      |
| TNFSF4      | GCTCCTGTGCTTCACCTACA   | CCTCCTTTTGGGAAGTGAGGAT      | SYBR         | 57°C      |
| VRK2        | AAGTGGATAGAACGCAAACAAC | CCTAGTCTTTCCATTACCATAAATCTG | UPL #6       | 60°C      |
| PPIA        | Hs_PPIA_1_SG           | QuantiTect Primer Assay     |              | 55°C      |
