# Supplementary material for: Cooperative Effect of miR-141-3p and miR-145-5p in the Regulation of Targets in Clear Cell Renal Cell Carcinoma
Source: PubMed Central journal article supplement (PMC4919070; doi:10.1371/journal.pone.0157801), 2016-06-23
Supplement: pone.0157801.s008.pdf [file pone.0157801.s008.pdf]

**S2 Table. Assay information for RT-qPCR.**

| Name     | Name<br>miRBase 21 | Accession #<br>miRBase 21 | Mature Sequence         | Assay<br>ID |
|----------|--------------------|---------------------------|-------------------------|-------------|
| miR-28   | hsa-miR-28-5p      | MIMAT0000085              | AAGGAGCUCACAGUCUAAUUGAG | 000 411     |
| miR-103  | hsa-miR-103a-3p    | MIMAT0000101              | AGCAGCAUUGUACAGGGCUAUGA | 000 439     |
| miR-106a | hsa-miR-106a-5p    | MIMAT0000103              | AAAAGUGCUUACAGUGCAGGUAG | 00 2169     |
| miR-141  | hsa-miR-141-3p     | MIMAT0000432              | UACACUGUCUGGUAAGAUGG    | 000463      |
| miR-145  | hsa-miR-145-5p     | MIMAT0000437              | GUCCAGUUUCCAGGAAUCCCU   | 00 2278     |
