# Supplementary material for: Cooperative Effect of miR-141-3p and miR-145-5p in the Regulation of Targets in Clear Cell Renal Cell Carcinoma
Source: PubMed Central journal article supplement (PMC4919070; doi:10.1371/journal.pone.0157801), 2016-06-23
Supplement: pone.0157801.s009.pdf [file pone.0157801.s009.pdf]

**S3 Table. Synthetic miRNAs.**

| miRNA      | Assay                                     | Assay ID |
|------------|-------------------------------------------|----------|
| miR-141-3p | miRVana™ miRNA mimic                      | MC10860  |
| miR-145-5p | miRVana™ miRNA mimic                      | MC11480  |
| NC#1       | mirVana™ miRNA Mimic, Negative Control #1 | 4464058  |
