# Supplementary material for: Cooperative Effect of miR-141-3p and miR-145-5p in the Regulation of Targets in Clear Cell Renal Cell Carcinoma
Source: PubMed Central journal article supplement (PMC4919070; doi:10.1371/journal.pone.0157801), 2016-06-23
Supplement: pone.0157801.s010.pdf [file pone.0157801.s010.pdf]

**S4 Table. Predicted targets for miR-141-3p and miR-145-5p.**

| Gene    | RefseqID     | Gene Name                                                                        |
|---------|--------------|----------------------------------------------------------------------------------|
| ACP2    | NM_001610    | ACP2 acid phosphatase 2, lysosomal [ Homo sapiens (human) ]                      |
| ADAMT   | NM_007037    | ADAMT8 ADAM metalloproteinase with thrombospondin type 1 motif, 8 [ Homo         |
| AHR     | NM_001621    | AHR aryl hydrocarbon receptor [ Homo sapiens (human) ]                           |
| AK2     | NM_013411    | AK2 adenylate kinase 2 [ Homo sapiens (human) ]                                  |
| ALG2    | NM_033087    | ALG2 ALG2, alpha-1,3/1,6-mannosyltransferase [ Homo sapiens (human) ]            |
| ALS2    | NM_020919    | ALS2 amyotrophic lateral sclerosis 2 (juvenile) [ Homo sapiens (human) ]         |
| APH1B   | NM_031301    | APH1B APH1B gamma secretase subunit [ Homo sapiens (human) ]                     |
| ARMC7   | NM_024585    | ARMC7 armadillo repeat containing 7 [ Homo sapiens (human) ]                     |
| ATXN1   | NM_000332    | ATXN1 ataxin 1 [ Homo sapiens (human) ]                                          |
| ATXN7L  | NM_020725    | ATXN7L1 ataxin 7-like 1 [ Homo sapiens (human) ]                                 |
| C10orf1 | NM_018017    | C10orf118 chromosome 10 open reading frame 118 [ Homo sapiens (human) ]          |
| C10orf4 | NM_153256    | PROSER2 proline and serine rich 2 [ Homo sapiens (human) ]                       |
| C14orf4 | NM_152592    | SYNE3 spectrin repeat containing, nuclear envelope family member 3 [ Homo        |
| C1QTNF  | NM_015645    | C1QTNF5 C1q and tumor necrosis factor related protein 5 [ Homo sapiens           |
| C6orf11 | NM_033069    | GFOD1 glucose-fructose oxidoreductase domain containing 1 [ Homo sapiens         |
| C9orf12 | NM_173690    | SCAI suppressor of cancer cell invasion [ Homo sapiens (human) ]                 |
| C9orf16 | NM_198573    | ENHO energy homeostasis associated [ Homo sapiens (human) ]                      |
| CCDC28  | NM_015439    | CCDC28A coiled-coil domain containing 28A [ Homo sapiens (human) ]               |
| CGNL1   | NM_032866    | CGNL1 cingulin-like 1 [ Homo sapiens (human) ]                                   |
| CIAO1   | NM_004804    | CIAO1 cytosolic iron-sulfur assembly component 1 [ Homo sapiens (human) ]        |
| DDHD1   | NM_030637    | DDHD1 DDHD domain containing 1 [ Homo sapiens (human) ]                          |
| DNHD1   | NM_144666    | DNHD1 dynein heavy chain domain 1 [ Homo sapiens (human) ]                       |
| DOK6    | NM_152721    | DOK6 docking protein 6 [ Homo sapiens (human) ]                                  |
| DPH3    | NM_001047434 | DPH3 diphthamide biosynthesis 3 [ Homo sapiens (human) ]                         |
| DUSP6   | NM_001946    | DUSP6 dual specificity phosphatase 6 [ Homo sapiens (human) ]                    |
| EAPP    | NM_018453    | EAPP E2F-associated phosphoprotein [ Homo sapiens (human) ]                      |
| ELOVL2  | NM_017770    | ELOVL2 ELOVL fatty acid elongase 2 [ Homo sapiens (human) ]                      |
| EPN1    | NM_001130071 | EPN1 epsin 1 [ Homo sapiens (human) ]                                            |
| FRMD4A  | NM_018027    | FRMD4A FERM domain containing 4A [ Homo sapiens (human) ]                        |
| FUS     | NM_004960    | FUS FUS RNA binding protein [ Homo sapiens (human) ]                             |
| GABAR   | NM_007285    | GABARAPL2 GABA(A) receptor-associated protein-like 2 [ Homo sapiens              |
| GLG1    | NM_012201    | GLG1 golgi glycoprotein 1 [ Homo sapiens (human) ]                               |
| GLULD1  | NM_016571    | LGSN lengsin, lens protein with glutamine synthetase domain [ Homo sapiens       |
| GOLM1   | NM_016548    | GOLM1 golgi membrane protein 1 [ Homo sapiens (human) ]                          |
| GPR137  | NM_001099652 | GPR137C G protein-coupled receptor 137C [ Homo sapiens (human) ]                 |
| GRB10   | NM_001001555 | GRB10 growth factor receptor-bound protein 10 [ Homo sapiens (human) ]           |
| GTF2H5  | NM_207118    | GTF2H5 general transcription factor IIH, polypeptide 5 [ Homo sapiens (human) ]  |
| HDAC8   | NM_018486    | HDAC8 histone deacetylase 8 [ Homo sapiens (human) ]                             |
| HS6ST2  | NM_001077188 | HS6ST2 heparan sulfate 6-O-sulfotransferase 2 [ Homo sapiens (human) ]           |
| HTATSF  | NM_014500    | HTATSF1 HIV-1 Tat specific factor 1 [ Homo sapiens (human) ]                     |
| HTR2C   | NM_000868    | HTR2C 5-hydroxytryptamine (serotonin) receptor 2C, G protein-coupled [ Homo      |
| IRS2    | NM_003749    | IRS2 insulin receptor substrate 2 [ Homo sapiens (human) ]                       |
| ITGB3   | NM_000212    | ITGB3 integrin, beta 3 (platelet glycoprotein IIIa, antigen CD61) [ Homo sapiens |
| KIAA160 | NM_020940    | FAM160B1 family with sequence similarity 160, member B1 [ Homo sapiens           |
| KLF5    | NM_001730    | KLF5 Kruppel-like factor 5 (intestinal) [ Homo sapiens (human) ]                 |
| LMLN    | NM_033029    | LMLN leishmanolysin-like (metalloproteinase M8 family) [ Homo sapiens (human) ]  |
| LOC440  | NM_001013698 | SMCO3 single-pass membrane protein with coiled-coil domains 3 [ Homo sapiens     |
| LOX     | NM_002317    | LOX lysyl oxidase [ Homo sapiens (human) ]                                       |
| LZIC    | NM_032368    | LZIC leucine zipper and CTNNBIP1 domain containing [ Homo sapiens (human) ]      |
| MDFIC   | NM_199072    | MDFIC MyoD family inhibitor domain containing [ Homo sapiens (human) ]           |
| MEGF11  | NM_032445    | MEGF11 multiple EGF-like-domains 11 [ Homo sapiens (human) ]                     |
| MGC338  | NM_175885    | FAM181B family with sequence similarity 181, member B [ Homo sapiens             |
| MKL2    | NM_014048    | MKL2 MKL/myocardin-like 2 [ Homo sapiens (human) ]                               |
| MON2    | NM_015026    | MON2 MON2 homolog (S. cerevisiae) [ Homo sapiens (human) ]                       |
| MTMR15  | NM_014967    | FAN1 FANCD2/FANCI-associated nuclease 1 [ Homo sapiens (human) ]                 |
| MX1     | NM_002462    | MX1 myxovirus (influenza virus) resistance 1, interferon-inducible protein p78   |
| NEK11   | NM_024800    | NEK11 NIMA-related kinase 11 [ Homo sapiens (human) ]                            |
| NPC1    | NM_000271    | NPC1 Niemann-Pick disease, type C1 [ Homo sapiens (human) ]                      |
| NRIP3   | NM_020645    | NRIP3 nuclear receptor interacting protein 3 [ Homo sapiens (human) ]            |
| NRP2    | NM_201266    | NRP2 neuropilin 2 [ Homo sapiens (human) ]                                       |

|               |              |                                                                                              |
|---------------|--------------|----------------------------------------------------------------------------------------------|
| <b>OSBPL9</b> | NM_148909    | OSBPL9 oxysterol binding protein-like 9 [ Homo sapiens (human) ]                             |
| <b>PAN2</b>   | NM_001127460 | PAN2 PAN2 poly(A) specific ribonuclease subunit [ Homo sapiens (human) ]                     |
| <b>PAPD4</b>  | NM_001114394 | PAPD4 PAP associated domain containing 4 [ Homo sapiens (human) ]                            |
| <b>PAQR9</b>  | NM_198504    | PAQR9 progesterin and adipoQ receptor family member IX [ Homo sapiens ]                      |
| <b>PDCD4</b>  | NM_145341    | PDCD4 programmed cell death 4 (neoplastic transformation inhibitor) [ Homo ]                 |
| <b>PLAG1</b>  | NM_002655    | PLAG1 pleiomorphic adenoma gene 1 [ Homo sapiens (human) ]                                   |
| <b>PNPLA6</b> | NM_006702    | PNPLA6 patatin-like phospholipase domain containing 6 [ Homo sapiens (human) ]               |
| <b>PPM1L</b>  | NM_139245    | PPM1L protein phosphatase, Mg <sup>2+</sup> /Mn <sup>2+</sup> dependent, 1L [ Homo sapiens ] |
| <b>PRTG</b>   | NM_173814    | PRTG protogenin [ Homo sapiens (human) ]                                                     |
| <b>PTGDR</b>  | NM_000953    | PTGDR prostaglandin D2 receptor (DP) [ Homo sapiens (human) ]                                |
| <b>RASAL2</b> | NM_170692    | RASAL2 RAS protein activator like 2 [ Homo sapiens (human) ]                                 |
| <b>RBPMS2</b> | NM_194272    | RBPMS2 RNA binding protein with multiple splicing 2 [ Homo sapiens (human) ]                 |
| <b>RIMS1</b>  | NM_014989    | RIMS1 regulating synaptic membrane exocytosis 1 [ Homo sapiens (human) ]                     |
| <b>RPA2</b>   | NM_002946    | RPA2 replication protein A2, 32kDa [ Homo sapiens (human) ]                                  |
| <b>SCARB2</b> | NM_005506    | SCARB2 scavenger receptor class B, member 2 [ Homo sapiens (human) ]                         |
| <b>SCML4</b>  | NM_198081    | SCML4 sex comb on midleg-like 4 (Drosophila) [ Homo sapiens (human) ]                        |
| <b>SLC16A</b> | NM_001042422 | SLC16A3 solute carrier family 16 (monocarboxylate transporter), member 3 [                   |
| <b>SLC25A</b> | NM_031291    | SLC25A31 solute carrier family 25 (mitochondrial carrier; adenine nucleotide                 |
| <b>SNED1</b>  | NM_001080437 | SNED1 sushi, nidogen and EGF-like domains 1 [ Homo sapiens (human) ]                         |
| <b>SPG3A</b>  | NM_001127713 | ATL1 atlastin GTPase 1 [ Homo sapiens (human) ]                                              |
| <b>SRP9</b>   | NM_001130440 | SRP9 signal recognition particle 9kDa [ Homo sapiens (human) ]                               |
| <b>SYPL2</b>  | NM_001040709 | SYPL2 synaptophysin-like 2 [ Homo sapiens (human) ]                                          |
| <b>TARSL2</b> | NM_152334    | TARSL2 threonyl-tRNA synthetase-like 2 [ Homo sapiens (human) ]                              |
| <b>TBC1D2</b> | NM_144572    | TBC1D2B TBC1 domain family, member 2B [ Homo sapiens (human) ]                               |
| <b>TGFB2</b>  | NM_003238    | TGFB2 transforming growth factor, beta 2 [ Homo sapiens (human) ]                            |
| <b>THEM2</b>  | NM_018473    | ACOT13 acyl-CoA thioesterase 13 [ Homo sapiens (human) ]                                     |
| <b>TMEM16</b> | NM_001025356 | ANO6 anoctamin 6 [ Homo sapiens (human) ]                                                    |
| <b>TMEM42</b> | NM_144638    | TMEM42 transmembrane protein 42 [ Homo sapiens (human) ]                                     |
| <b>TNFSF4</b> | NM_003326    | TNFSF4 tumor necrosis factor (ligand) superfamily, member 4 [ Homo sapiens ]                 |
| <b>TRIM65</b> | NM_173547    | TRIM65 tripartite motif containing 65 [ Homo sapiens (human) ]                               |
| <b>TTC14</b>  | NM_001042601 | TTC14 tetratricopeptide repeat domain 14 [ Homo sapiens (human) ]                            |
| <b>USP13</b>  | NM_003940    | USP13 ubiquitin specific peptidase 13 (isopeptidase T-3) [ Homo sapiens ]                    |
| <b>VRK2</b>   | NM_001130483 | VRK2 vaccinia related kinase 2 [ Homo sapiens (human) ]                                      |
| <b>WDFY3</b>  | NM_014991    | WDFY3 WD repeat and FYVE domain containing 3 [ Homo sapiens (human) ]                        |
| <b>WDR37</b>  | NM_014023    | WDR37 WD repeat domain 37 [ Homo sapiens (human) ]                                           |
| <b>WDR43</b>  | NM_015131    | WDR43 WD repeat domain 43 [ Homo sapiens (human) ]                                           |
| <b>YTHDF2</b> | NM_016258    | YTHDF2 YTH domain family, member 2 [ Homo sapiens (human) ]                                  |
| <b>ZNF24</b>  | NM_006965    | ZNF24 zinc finger protein 24 [ Homo sapiens (human) ]                                        |
| <b>ZNF398</b> | NM_020781    | ZNF398 zinc finger protein 398 [ Homo sapiens (human) ]                                      |
| <b>ZNF830</b> | NM_052857    | ZNF830 zinc finger protein 830 [ Homo sapiens (human) ]                                      |

Selected targets for further analysis are shaded in gray.
