# Supplementary material for: Cooperative Effect of miR-141-3p and miR-145-5p in the Regulation of Targets in Clear Cell Renal Cell Carcinoma
Source: PubMed Central journal article supplement (PMC4919070; doi:10.1371/journal.pone.0157801), 2016-06-23
Supplement: pone.0157801.s011.pdf [file pone.0157801.s011.pdf]

**S5 Table. Univariate und multivariate Cox regression for ccRCC patients**

**(pN0M0 only) (n = 284).**

|               | Criteria                                                                   | univariate analysis |          | multivariate analysis (inclusion) <sup>a</sup> |          |                                           |          |
|---------------|----------------------------------------------------------------------------|---------------------|----------|------------------------------------------------|----------|-------------------------------------------|----------|
|               |                                                                            |                     |          | only clinicopathological variables             |          | clinicopathological variables and targets |          |
|               |                                                                            | HR                  | p-value  | HR                                             | p-value  | HR                                        | p-value  |
| Age           | continuous                                                                 | 1.053               | < 0.0001 | 1.052                                          | < 0.0001 | 1.053                                     | < 0.0001 |
| Sex           | female<br>male                                                             | 0.747               | 0.202    |                                                |          |                                           |          |
| pT status     | pT1-2<br>pT3-4                                                             | 2.398               | < 0.0001 | 2.160                                          | 0.001    | 1.956                                     | 0.004    |
| Fuhrman grade | G1-2<br>G3-4                                                               | 1.934               | 0.029    | 1.527                                          | 0.171    | 1.596                                     | 0.135    |
| LOX           | LOX <sub>a</sub> > LOX <sub>z</sub><br>LOX <sub>a</sub> ≤ LOX <sub>z</sub> | 0.195               | 0.105    |                                                |          | 0.242                                     | 0.162    |

HR = Hazard Ratio

<sup>a</sup> only variables which were significant in the univariate analysis are included in multivariate models
